# Supplementary material for: Salinomycin induces cell death and differentiation in head and neck squamous cell carcinoma stem cells despite activation of epithelial-mesenchymal transition and Akt
Source: PubMed Central journal article supplement (PMC3522015; doi:10.1186/1471-2407-12-556), 2012-11-24

# A Metformin Treatment of JLO-1

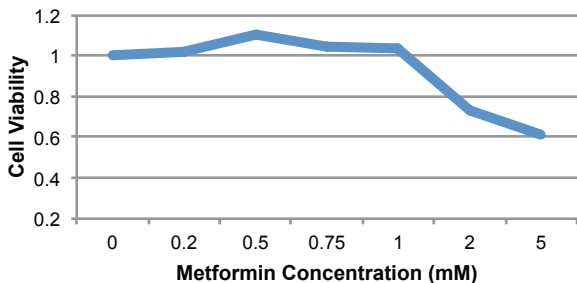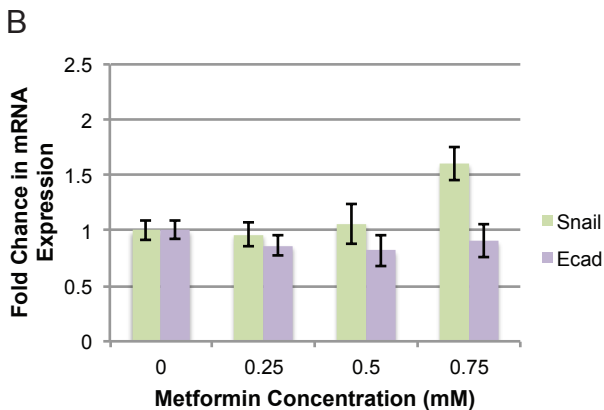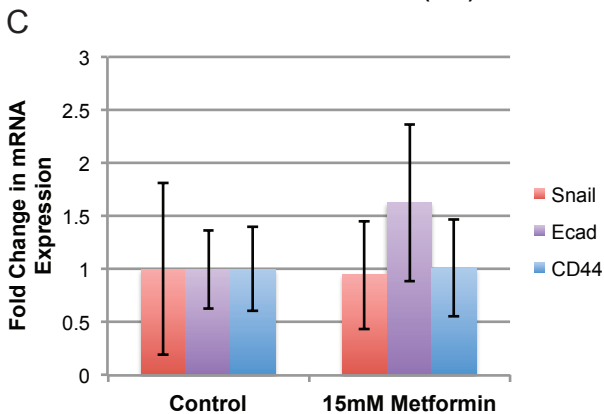

Supplement: 1471-2407-12-556-S1.pdf [file 1471-2407-12-556-S1.pdf]
